# Supplementary material for: Understanding the Molecule-Electrode Interface for Molecular Spintronic Devices: A Computational and Experimental Study
Source: MDPI journal article supplement (doi:10.3390/molecules23061441), 2018-06-13
Supplement: s1 [file s1]

## Understanding the molecule-electrode interface for molecular spintronic devices: A computational and experimental study

Lidia Rosado Piquer,<sup>a,b</sup> Raquel Royo Sánchez,<sup>a</sup> E. Carolina Sañudo<sup>a,b,\*</sup>

and Jorge Echeverría<sup>a,c,\*</sup>

*a-Departament de Química Inorgànica, Secció de Química Inorgànica, b- Institut de Nanociència i Nanotecnologia (IN2UB), c-Institut de Química Teòrica i Computacional (IQTC-UB) Universitat Barcelona, Martí i Franqués 1-11,08028, Barcelona.*

**SYMLH2 characterization:** the synthesis of the ligand was performed following our reported procedure (New J. Chem., 2017, 41, 10101). NMR, IR and ESI-MS are in agreement with the data reported therein.

SYMLH<sub>2</sub> <sup>1</sup>H-NMR in CDCl<sub>3</sub>

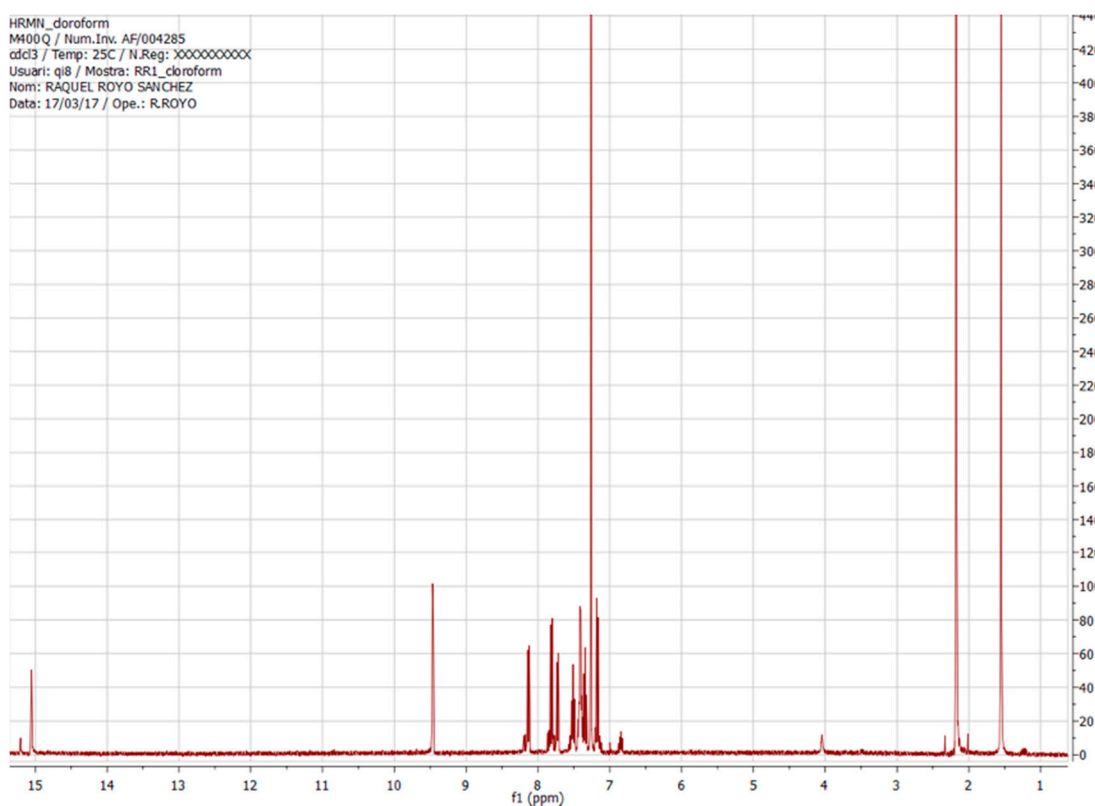

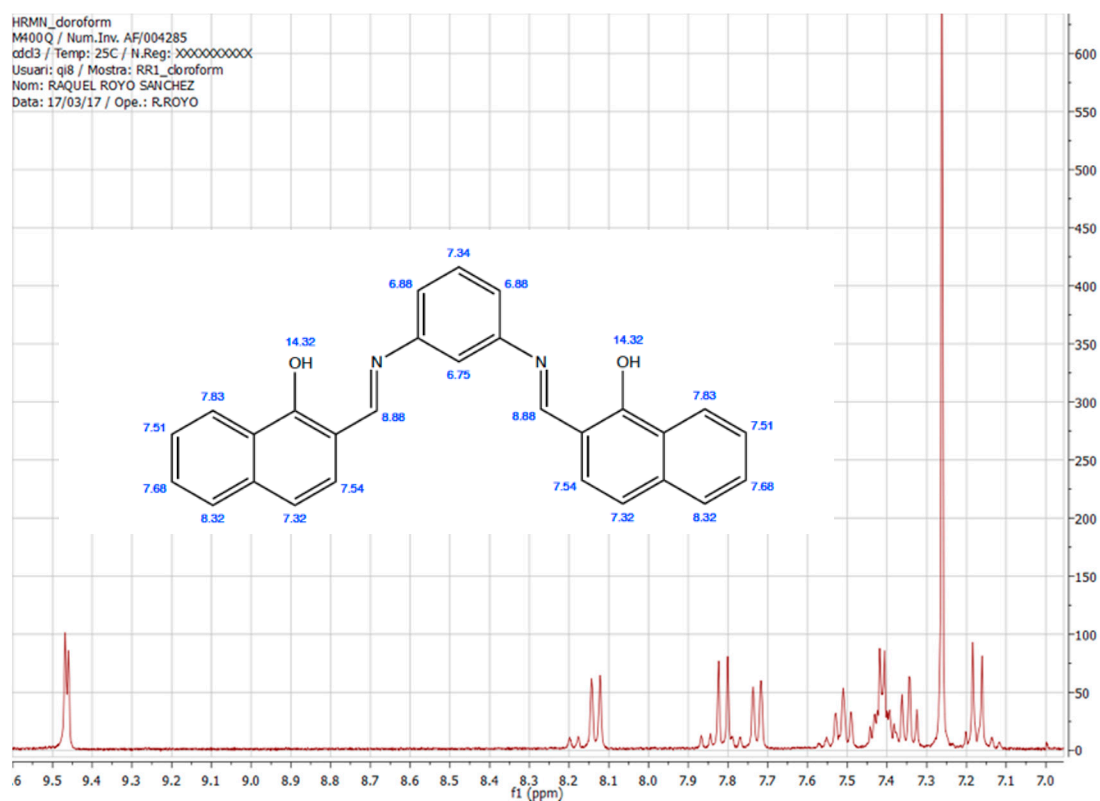

$^1\text{H}$  NMR chemical shifts calculated using ChemBioDraw.

IR spectrum of SYMLH<sub>2</sub>

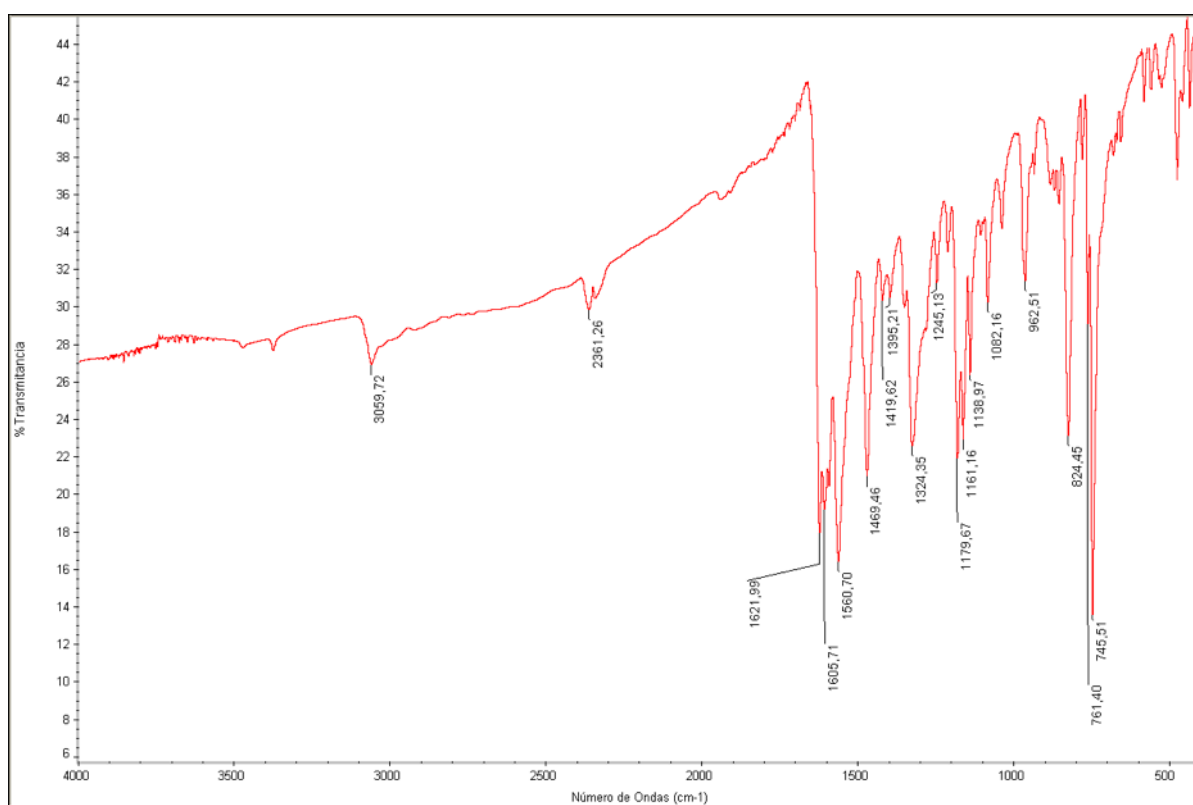

IR spectrum of iron oxide NP with oleic acid monolayer

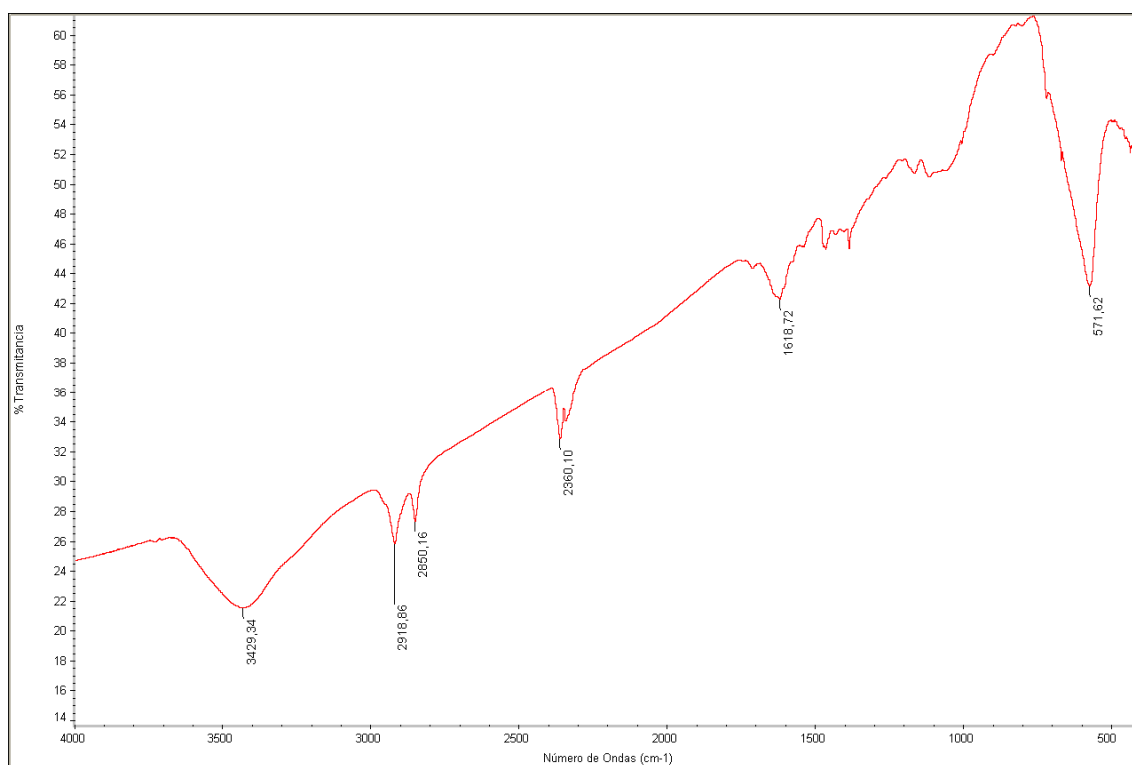

## Magnetic properties of SYML-Dy2

Magnetization vs. field plot for SYML-Dy2 at 2 K.

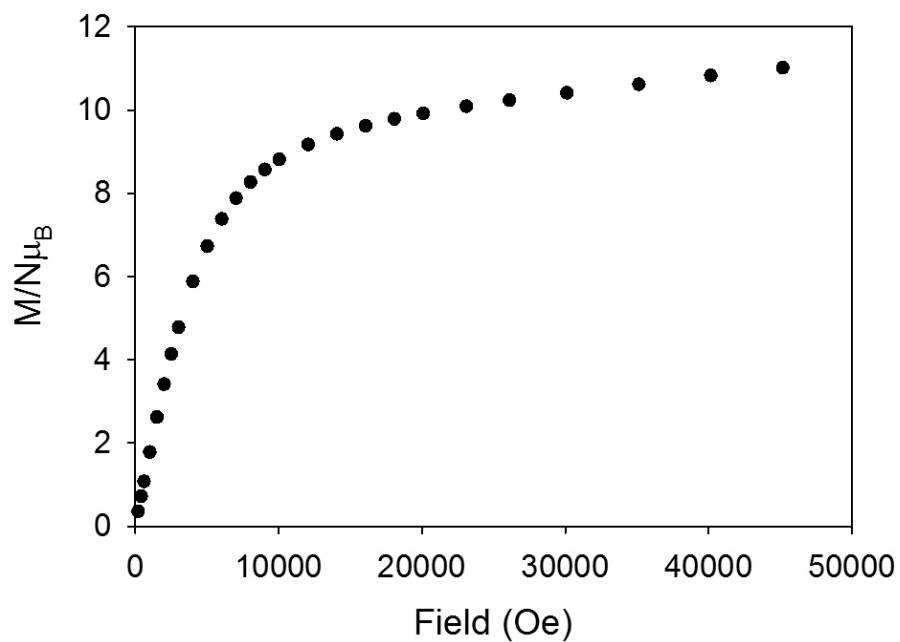

Out-of-phase ac magnetic susceptibility of SYML\_Dy2 at different applied DC fields at 1000 Hz.

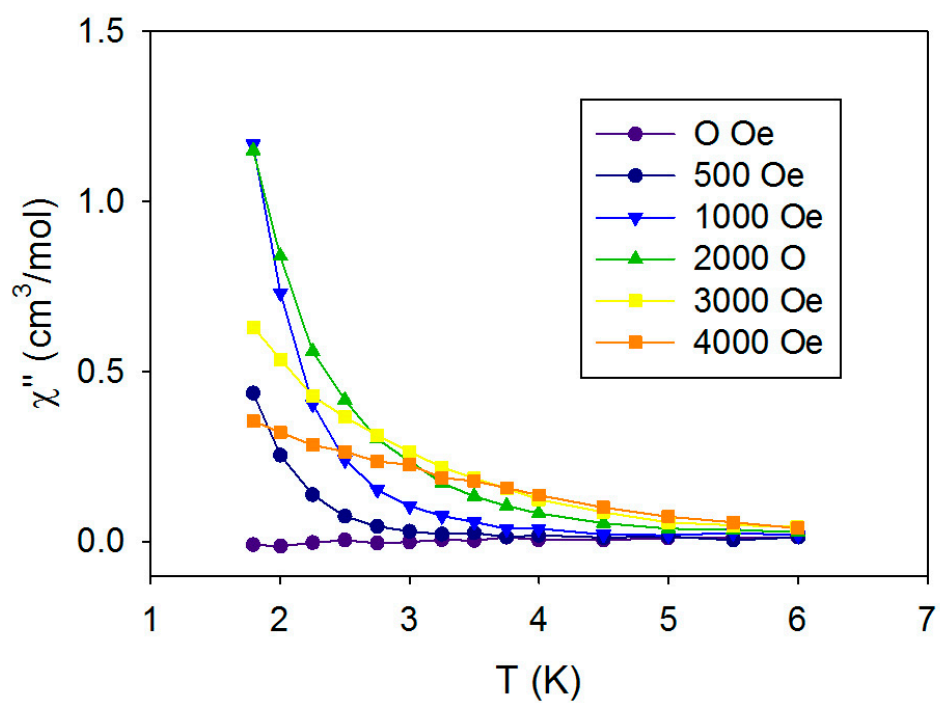

Out-of-phase AC magnetic susceptibility as a function of frequency with an applied DC field of 2000 Oe between 1.8 K (black) and 3.6 K (dark green).

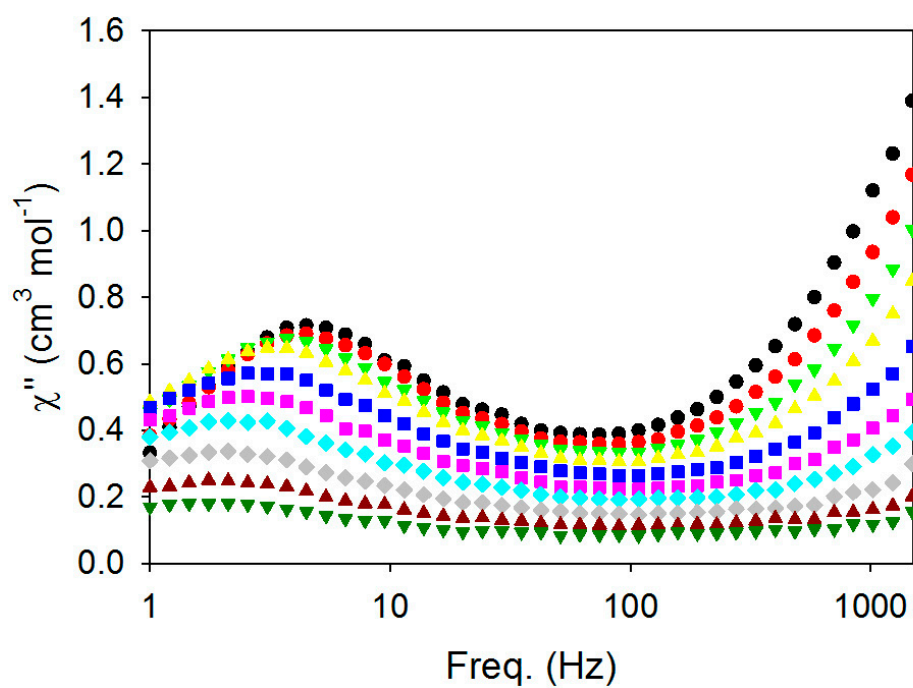

Argand plot for SYML-Dy2 with an applied dc field of 2000 Oe at the indicated temperatures with frequencies between 1 and 1500 Hz.

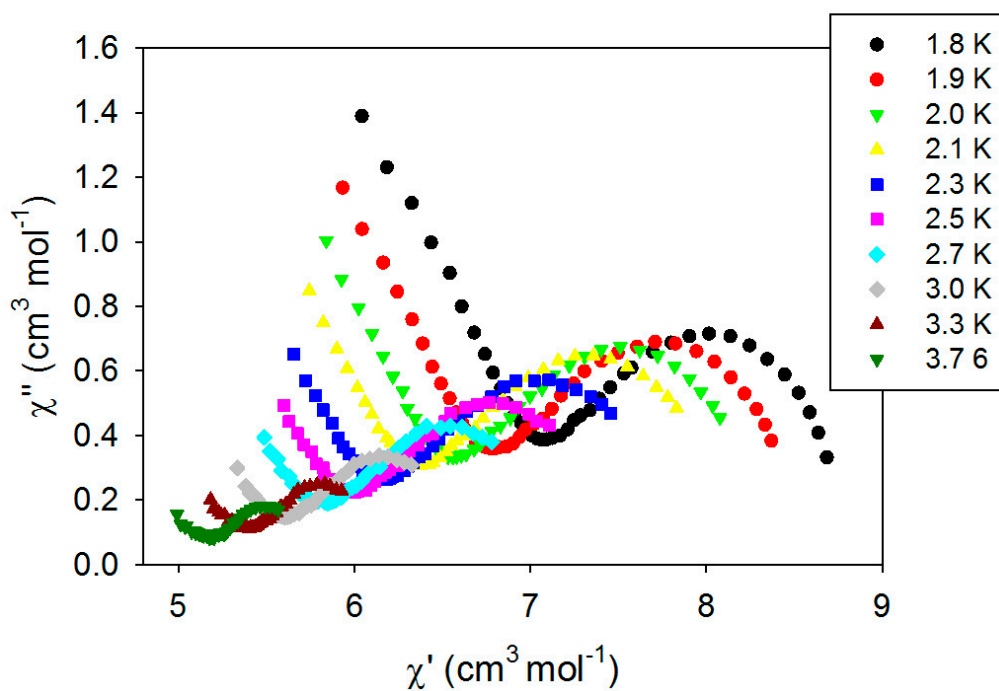

## Cartesian coordinates of optimized systems.

### Tetramer of (*E*)-dec-5-enoic acid

|   |           |           |           |
|---|-----------|-----------|-----------|
| H | -1.001935 | 3.961386  | -5.585817 |
| H | 2.176077  | -1.003863 | -4.704647 |
| H | -2.866566 | -4.148321 | -4.236597 |
| H | 0.308807  | -9.113530 | -3.359415 |
| O | -0.575805 | 6.114204  | -4.591916 |
| O | -1.065346 | 3.983892  | -4.237494 |
| O | 2.602299  | 1.148749  | -3.710355 |
| O | 2.112495  | -0.981571 | -3.356340 |
| O | -2.440150 | -1.995582 | -3.242685 |
| O | -2.929877 | -4.125844 | -2.888269 |
| O | 0.737891  | -6.961665 | -2.364983 |
| O | 0.246631  | -9.091615 | -2.011020 |
| C | -0.908637 | 5.232868  | -3.844264 |
| C | 2.441029  | 0.230742  | -2.951561 |
| C | -2.558920 | -2.921188 | -2.486537 |
| C | 0.482943  | -7.856472 | -1.605155 |
| C | -1.232640 | 5.391452  | -2.365228 |
| H | -2.002847 | 6.171071  | -2.321829 |
| H | -1.670248 | 4.467763  | -1.978011 |
| C | -2.289211 | -2.859843 | -0.988488 |
| H | -3.243605 | -2.951287 | -0.455011 |
| H | -1.697236 | -3.739793 | -0.711269 |
| C | 2.638335  | 0.238681  | -1.443481 |
| H | 2.000916  | -0.526543 | -0.990610 |
| H | 3.671612  | -0.100449 | -1.285730 |
| C | 0.393471  | -7.730200 | -0.089077 |
| H | -0.606889 | -8.055873 | 0.220508  |

|   |           |           |           |
|---|-----------|-----------|-----------|
| H | 1.093667  | -8.448736 | 0.354001  |
| C | -0.031541 | 5.814430  | -1.508617 |
| H | 0.474178  | 6.664031  | -1.981136 |
| H | 0.693816  | 4.993198  | -1.461806 |
| C | -1.563971 | -1.559336 | -0.627056 |
| H | -2.207726 | -0.707671 | -0.869474 |
| H | -0.683830 | -1.459297 | -1.273833 |
| C | 2.433321  | 1.603845  | -0.789443 |
| H | 1.372415  | 1.881140  | -0.832355 |
| H | 2.975002  | 2.362567  | -1.364452 |
| C | 0.691573  | -6.301839 | 0.373173  |
| H | -0.028208 | -5.614535 | -0.084854 |
| H | 1.672509  | -6.003186 | -0.013125 |
| C | -0.496182 | 6.188021  | -0.088504 |
| H | -1.128214 | 5.382805  | 0.301328  |
| H | -1.142006 | 7.076505  | -0.165144 |
| C | 2.913469  | 1.583582  | 0.667249  |
| H | 2.417629  | 0.764208  | 1.205758  |
| H | 3.985568  | 1.330927  | 0.680144  |
| C | -1.130924 | -1.504126 | 0.843913  |
| H | -0.494670 | -2.375827 | 1.056009  |
| H | -2.007293 | -1.600679 | 1.495264  |
| C | 0.661289  | -6.146200 | 1.903477  |
| H | 1.341235  | -6.889537 | 2.346803  |
| H | -0.339177 | -6.381962 | 2.282214  |
| C | 0.636017  | 6.471139  | 0.859908  |
| H | 1.384303  | 7.176823  | 0.497886  |
| C | -0.361689 | -0.245992 | 1.155815  |
| H | 0.311259  | 0.076840  | 0.363165  |
| C | 2.700650  | 2.880449  | 1.404405  |
| H | 2.471432  | 3.762138  | 0.806351  |

|   |           |           |          |
|---|-----------|-----------|----------|
| C | 1.099401  | -4.770623 | 2.332175 |
| H | 2.099735  | -4.494200 | 1.996343 |
| C | 0.797443  | 5.945444  | 2.079874 |
| H | 1.679943  | 6.245424  | 2.646351 |
| C | -0.407040 | 0.503737  | 2.263469 |
| H | 0.238600  | 1.382333  | 2.304652 |
| C | 2.804362  | 3.022097  | 2.730289 |
| H | 2.666861  | 4.016378  | 3.151167 |
| C | 0.414979  | -3.866642 | 3.043551 |
| H | 0.905126  | -2.913477 | 3.246808 |
| C | -0.104602 | 4.947482  | 2.767083 |
| H | -1.147416 | 5.086016  | 2.458704 |
| H | 0.179793  | 3.936357  | 2.444165 |
| C | -1.233786 | 0.265624  | 3.496823 |
| H | -1.849502 | 1.155125  | 3.694487 |
| H | -1.929728 | -0.568342 | 3.352750 |
| C | 3.119096  | 1.920491  | 3.713437 |
| H | 4.167801  | 1.604876  | 3.600114 |
| H | 2.519812  | 1.028350  | 3.481694 |
| C | -0.963861 | -3.992945 | 3.630057 |
| H | -1.456741 | -4.913197 | 3.297606 |
| H | -1.580037 | -3.162141 | 3.258590 |
| C | -0.019686 | 5.008094  | 4.298734 |
| H | 1.032388  | 4.932654  | 4.606700 |
| H | -0.369323 | 5.987407  | 4.652719 |
| C | 2.873883  | 2.337214  | 5.168220 |
| H | 3.488145  | 3.219408  | 5.398302 |
| H | 1.830689  | 2.661390  | 5.277079 |
| C | -0.370366 | -0.010361 | 4.740862 |
| H | 0.227023  | -0.915698 | 4.569365 |
| H | 0.351860  | 0.805719  | 4.872158 |

|   |           |           |          |
|---|-----------|-----------|----------|
| C | -0.958952 | -3.940604 | 5.168347 |
| H | -0.380309 | -4.788532 | 5.557826 |
| H | -0.431425 | -3.035618 | 5.496970 |
| C | -0.816408 | 3.891750  | 4.981041 |
| H | -1.873217 | 3.965807  | 4.690678 |
| H | -0.465823 | 2.925893  | 4.596446 |
| C | 3.167122  | 1.232889  | 6.186804 |
| H | 4.197364  | 0.876765  | 6.051353 |
| H | 2.517692  | 0.371582  | 5.982456 |
| C | -1.195890 | -0.167784 | 6.021127 |
| H | -1.794947 | 0.739982  | 6.174327 |
| H | -1.914277 | -0.987606 | 5.889484 |
| C | -2.366567 | -3.951681 | 5.773441 |
| H | -2.889416 | -4.865698 | 5.460659 |
| H | -2.943901 | -3.115298 | 5.355584 |
| C | -0.697663 | 3.906577  | 6.507246 |
| H | -1.257426 | 3.082261  | 6.961613 |
| H | 0.348182  | 3.810902  | 6.820750 |
| H | -1.081634 | 4.843664  | 6.925752 |
| C | 2.969234  | 1.696255  | 7.632719 |
| H | 3.146752  | 0.884579  | 8.345455 |
| H | 3.653241  | 2.515873  | 7.880320 |
| H | 1.949008  | 2.063521  | 7.793355 |
| C | -0.337086 | -0.429782 | 7.260427 |
| H | -0.952422 | -0.553463 | 8.157669 |
| H | 0.263236  | -1.339054 | 7.141445 |
| H | 0.354750  | 0.398815  | 7.442222 |
| C | -2.357996 | -3.856579 | 7.301599 |
| H | -3.372966 | -3.868002 | 7.711683 |
| H | -1.808642 | -4.694930 | 7.744708 |
| H | -1.872531 | -2.932318 | 7.633440 |

# Adduct B-C

|   |          |          |          |
|---|----------|----------|----------|
| C | -0.88368 | -0.44928 | -1.68803 |
| C | -0.58289 | -0.75501 | -0.33485 |
| C | 0.77671  | -0.92517 | 0.04764  |
| C | 1.7899   | -0.77961 | -0.93597 |
| C | 1.46901  | -0.48241 | -2.23484 |
| C | 0.11582  | -0.31539 | -2.61552 |
| H | -1.92299 | -0.31385 | -1.97377 |
| H | 2.82771  | -0.90757 | -0.64106 |
| H | 2.2522   | -0.37257 | -2.97804 |
| H | -0.12479 | -0.07911 | -3.64698 |
| C | 0.43103  | 2.43361  | 1.33603  |
| H | 0.08256  | 3.26229  | 1.96278  |
| H | 1.49662  | 2.28496  | 1.53501  |
| H | -0.09571 | 1.52857  | 1.65543  |
| C | 0.07785  | -1.35072 | 2.33128  |
| H | 0.31896  | -1.57755 | 3.36474  |
| C | -1.59525 | -0.88637 | 0.65135  |
| H | -2.63248 | -0.75042 | 0.35735  |
| C | -1.27446 | -1.17607 | 1.9522   |
| C | 1.07696  | -1.22695 | 1.40162  |
| H | -2.05699 | -1.2714  | 2.69803  |
| H | 2.11657  | -1.35567 | 1.6896   |
| C | 0.1732   | 2.71554  | -0.1421  |
| H | 0.70897  | 3.62389  | -0.44386 |
| H | 0.58511  | 1.89867  | -0.74422 |
| C | -1.31284 | 2.87206  | -0.455   |
| H | -1.74536 | 3.7195   | 0.08835  |

|   |          |         |          |
|---|----------|---------|----------|
| H | -1.48314 | 3.03426 | -1.5237  |
| H | -1.8628  | 1.97202 | -0.15972 |

# Adduct A-C

|   |          |          |          |
|---|----------|----------|----------|
| C | -2.72575 | -1.06683 | 1.04771  |
| C | -1.54971 | -1.69823 | 0.73665  |
| C | -0.30212 | -1.13853 | 1.11626  |
| C | -0.28801 | 0.08472  | 1.842    |
| C | -1.52192 | 0.71307  | 2.15221  |
| C | -2.71132 | 0.15537  | 1.761    |
| H | 0.91751  | -2.68858 | 0.2275   |
| H | -3.67344 | -1.50171 | 0.74667  |
| H | -1.55712 | -2.63614 | 0.18789  |
| C | 0.93174  | -1.75483 | 0.78316  |
| C | 0.95948  | 0.64813  | 2.2144   |
| H | -1.50793 | 1.65077  | 2.70098  |
| H | -3.6488  | 0.64793  | 1.99864  |
| C | 2.1356   | 0.03231  | 1.87508  |
| C | 2.12164  | -1.18315 | 1.15061  |
| H | 0.96724  | 1.58371  | 2.76684  |
| H | 3.08472  | 0.4755   | 2.15959  |
| H | 3.06001  | -1.66073 | 0.88681  |
| C | -0.36423 | 1.13845  | -1.40628 |
| C | 0.96411  | 1.22406  | -1.34951 |
| H | 1.4138   | 1.93612  | -0.65932 |
| H | -0.96113 | 1.77921  | -0.75865 |
| C | 1.91025  | 0.36349  | -2.14734 |
| H | 1.72647  | 0.50376  | -3.22172 |
| H | 1.69289  | -0.6937  | -1.94233 |
| C | -1.12408 | 0.1711   | -2.27527 |

|   |          |          |          |
|---|----------|----------|----------|
| H | -0.68178 | 0.14312  | -3.27971 |
| H | -1.00249 | -0.84231 | -1.8667  |
| C | 3.37798  | 0.64854  | -1.83689 |
| H | 4.04374  | 0.0125   | -2.42708 |
| H | 3.62828  | 1.6922   | -2.05352 |
| H | 3.58635  | 0.46957  | -0.77715 |
| C | -2.61229 | 0.49916  | -2.36947 |
| H | -2.76831 | 1.49371  | -2.79969 |
| H | -3.1435  | -0.22482 | -2.994   |
| H | -3.06964 | 0.48746  | -1.37492 |

#### Adduct A-D

|   |          |          |          |
|---|----------|----------|----------|
| C | -2.20669 | -1.33176 | 0.21204  |
| C | -1.55838 | -1.44828 | -1.01551 |
| C | -1.11778 | -0.30711 | -1.68075 |
| C | -1.32204 | 0.94968  | -1.11679 |
| C | -1.96497 | 1.06521  | 0.11208  |
| C | -2.40998 | -0.07507 | 0.77522  |
| H | -2.55279 | -2.22148 | 0.72892  |
| H | -1.39991 | -2.42784 | -1.45609 |
| H | -0.61197 | -0.39862 | -2.63704 |
| H | -0.97418 | 1.83957  | -1.63265 |
| H | -2.11212 | 2.04425  | 0.55667  |
| H | -2.90986 | 0.01617  | 1.7344   |
| C | 1.22901  | -0.13428 | 1.0645   |
| H | 0.63011  | -1.04362 | 1.09905  |
| C | 1.07287  | 0.7514   | 2.04819  |
| H | 0.35562  | 0.5166   | 2.83388  |
| C | 2.10825  | 0.01355  | -0.15009 |

|   |          |          |          |
|---|----------|----------|----------|
| H | 3.03916  | 0.53299  | 0.1056   |
| H | 1.59321  | 0.65175  | -0.8808  |
| C | 1.71877  | 2.10643  | 2.1376   |
| H | 2.65374  | 2.12739  | 1.56761  |
| H | 1.98284  | 2.32157  | 3.17978  |
| C | 0.7859   | 3.2078   | 1.6155   |
| H | 1.24497  | 4.19684  | 1.70826  |
| H | 0.5454   | 3.03432  | 0.56214  |
| H | -0.15683 | 3.21837  | 2.17239  |
| C | 2.42822  | -1.32947 | -0.80522 |
| H | 1.50461  | -1.84104 | -1.09586 |
| H | 3.04015  | -1.20072 | -1.70254 |
| H | 2.97089  | -1.98452 | -0.11651 |

#### Adduct B-D

|   |          |          |          |
|---|----------|----------|----------|
| C | -1.16635 | 2.30079  | 0.49467  |
| H | -1.35155 | 2.73196  | 1.48485  |
| H | -1.16423 | 1.21204  | 0.59304  |
| H | -2.00669 | 2.58197  | -0.14967 |
| C | 0.15354  | 2.80909  | -0.07985 |
| H | 0.97869  | 2.47525  | 0.56067  |
| H | 0.32429  | 2.34216  | -1.05688 |
| C | 0.19332  | 4.32928  | -0.2209  |
| H | 0.05589  | 4.81724  | 0.75019  |
| H | 1.146    | 4.67221  | -0.63602 |
| H | -0.60544 | 4.68199  | -0.88249 |
| C | 1.23636  | -0.56129 | 0.10198  |
| C | 0.59147  | -0.58709 | -1.13202 |
| C | 0.59998  | -1.07042 | 1.23069  |

|   |          |          |          |
|---|----------|----------|----------|
| C | -0.69009 | -1.12067 | -1.23769 |
| H | 1.0862   | -0.18579 | -2.011   |
| C | -0.68079 | -1.60804 | 1.12456  |
| H | 1.10095  | -1.04724 | 2.19329  |
| C | -1.32583 | -1.63304 | -0.10925 |
| H | -1.19376 | -1.13734 | -2.19903 |
| H | -1.17609 | -2.00633 | 2.00453  |
| H | -2.32407 | -2.05136 | -0.1919  |
| H | 2.23226  | -0.13757 | 0.18459  |
